# Supplementary material for: Systemic analysis of the response of Aspergillus niger to ambient pH
Source: PubMed Central journal article supplement (PMC2718513; doi:10.1186/gb-2009-10-5-r47), 2009-05-01

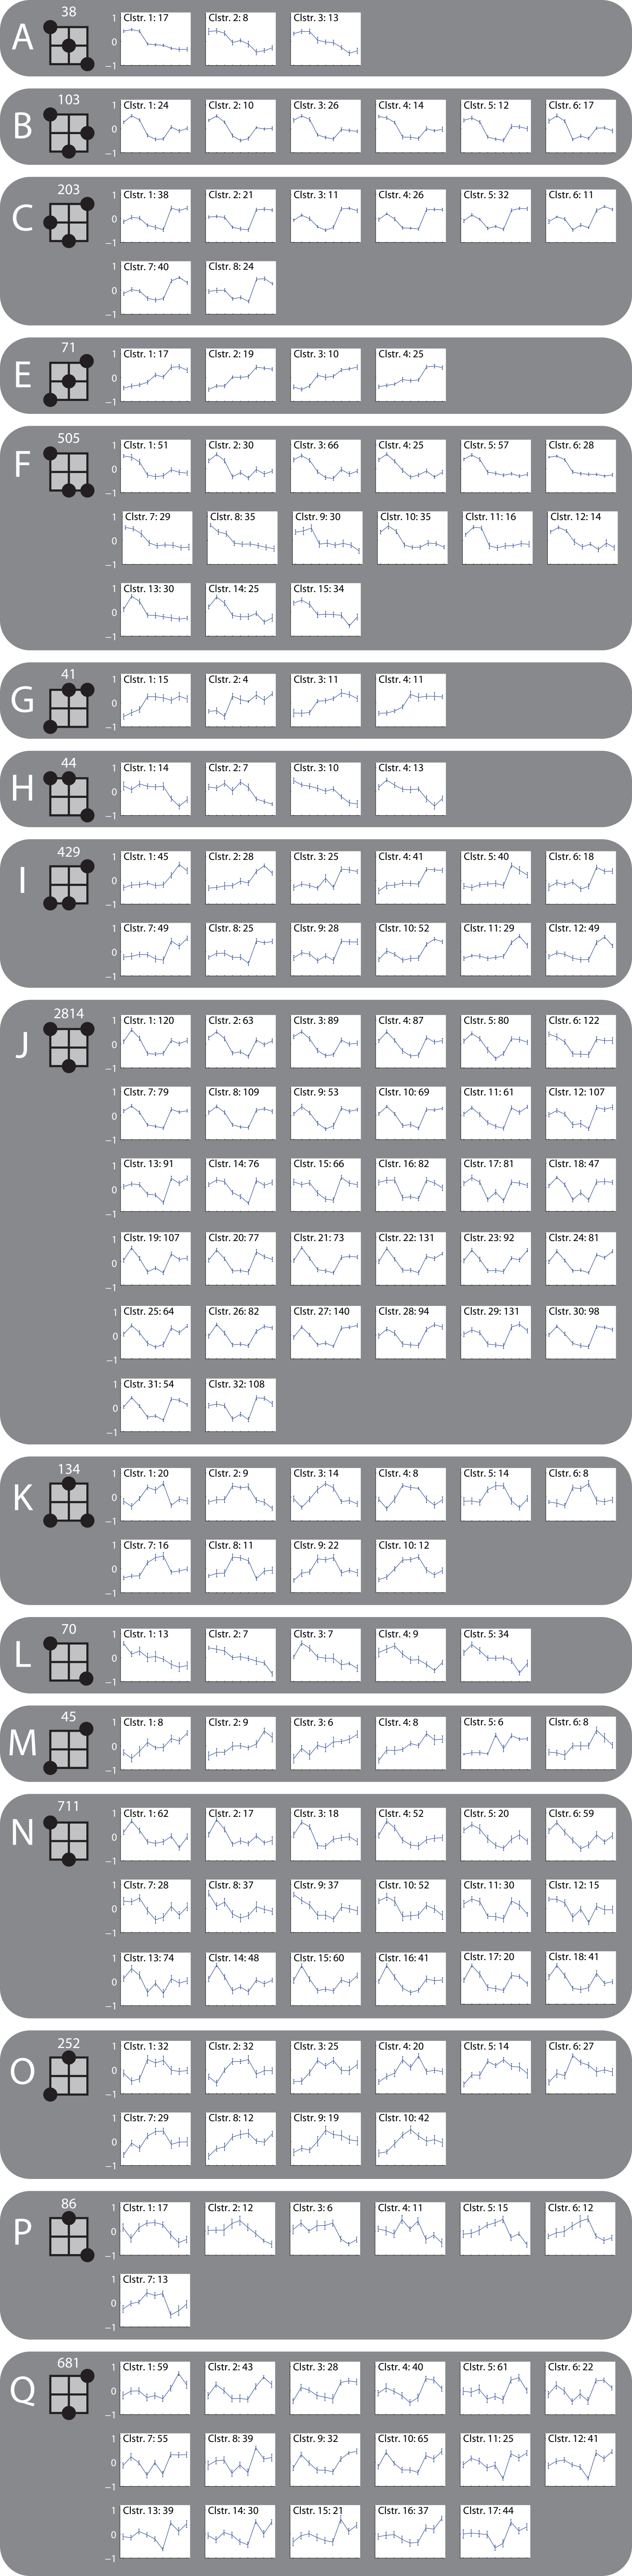

Supplement: gb-2009-10-5-r47-S4.pdf [file gb-2009-10-5-r47-S4.pdf]
