# Supplementary material for: Systemic analysis of the response of Aspergillus niger to ambient pH
Source: PubMed Central journal article supplement (PMC2718513; doi:10.1186/gb-2009-10-5-r47), 2009-05-01
Supplement: gb-2009-10-5-r47-S6.pdf [file gb-2009-10-5-r47-S6.pdf]

Suppl. Table 6: Proton-creating reactions of the acid-production model

| 1.5       |                                                                        | 2                                                                      |                                                                        | 2.5                                                                    |  | 3 |  |
|-----------|------------------------------------------------------------------------|------------------------------------------------------------------------|------------------------------------------------------------------------|------------------------------------------------------------------------|--|---|--|
| Citrate   | $\text{CITe} \rightleftharpoons \text{CIT-e} + 0.0224 \text{ H+e}$     | $\text{CITe} \rightleftharpoons \text{CIT-e} + 0.0677 \text{ H+e}$     | $\text{CITe} \rightleftharpoons \text{CIT-e} + 0.1882 \text{ H+e}$     | $\text{CITe} \rightleftharpoons \text{CIT-e} + 0.4313 \text{ H+e}$     |  |   |  |
| Gluconate | $\text{GLCNTe} \rightleftharpoons \text{GLCNT-e} + 0.0063 \text{ H+e}$ | $\text{GLCNTe} \rightleftharpoons \text{GLCNT-e} + 0.0196 \text{ H+e}$ | $\text{GLCNTe} \rightleftharpoons \text{GLCNT-e} + 0.0594 \text{ H+e}$ | $\text{GLCNTe} \rightleftharpoons \text{GLCNT-e} + 0.1663 \text{ H+e}$ |  |   |  |
| Lactate   | $\text{LACe} \rightleftharpoons \text{LAC-e} + 0.0043 \text{ H+e}$     | $\text{LACe} \rightleftharpoons \text{LAC-e} + 0.0136 \text{ H+e}$     | $\text{LACe} \rightleftharpoons \text{LAC-e} + 0.0418 \text{ H+e}$     | $\text{LACe} \rightleftharpoons \text{LAC-e} + 0.1213 \text{ H+e}$     |  |   |  |
| Acetate   | $\text{ACe} \rightleftharpoons \text{AC-e} + 0.0006 \text{ H+e}$       | $\text{ACe} \rightleftharpoons \text{AC-e} + 0.0018 \text{ H+e}$       | $\text{ACe} \rightleftharpoons \text{AC-e} + 0.0056 \text{ H+e}$       | $\text{ACe} \rightleftharpoons \text{AC-e} + 0.0175 \text{ H+e}$       |  |   |  |
| Oxalate   | $\text{OXALe} \rightleftharpoons \text{OXAL-e} + 0.6524 \text{ H+e}$   | $\text{OXALe} \rightleftharpoons \text{OXAL-e} + 0.8611 \text{ H+e}$   | $\text{OXALe} \rightleftharpoons \text{OXAL-e} + 0.969 \text{ H+e}$    | $\text{OXALe} \rightleftharpoons \text{OXAL-e} + 1.044 \text{ H+e}$    |  |   |  |
| Succinate | $\text{SUCCe} \rightleftharpoons \text{SUCC-e} + 0.0022 \text{ H+e}$   | $\text{SUCCe} \rightleftharpoons \text{SUCC-e} + 0.0069 \text{ H+e}$   | $\text{SUCCe} \rightleftharpoons \text{SUCC-e} + 0.0214 \text{ H+e}$   | $\text{SUCCe} \rightleftharpoons \text{SUCC-e} + 0.0651 \text{ H+e}$   |  |   |  |
| Malate    | $\text{MALe} \rightleftharpoons \text{MAL-e} + 0.0124 \text{ H+e}$     | $\text{MALe} \rightleftharpoons \text{MAL-e} + 0.0383 \text{ H+e}$     | $\text{MALe} \rightleftharpoons \text{MAL-e} + 0.1124 \text{ H+e}$     | $\text{MALe} \rightleftharpoons \text{MAL-e} + 0.2885 \text{ H+e}$     |  |   |  |
| pH        | 3.5                                                                    | 4                                                                      | 4.5                                                                    | 5                                                                      |  |   |  |
| Citrate   | $\text{CITe} \rightleftharpoons \text{CIT-e} + 0.7431 \text{ H+e}$     | $\text{CITe} \rightleftharpoons \text{CIT-e} + 1.0253 \text{ H+e}$     | $\text{CITe} \rightleftharpoons \text{CIT-e} + 1.3196 \text{ H+e}$     | $\text{CITe} \rightleftharpoons \text{CIT-e} + 1.6553 \text{ H+e}$     |  |   |  |
| Gluconate | $\text{GLCNTe} \rightleftharpoons \text{GLCNT-e} + 0.3869 \text{ H+e}$ | $\text{GLCNTe} \rightleftharpoons \text{GLCNT-e} + 0.6661 \text{ H+e}$ | $\text{GLCNTe} \rightleftharpoons \text{GLCNT-e} + 0.8632 \text{ H+e}$ | $\text{GLCNTe} \rightleftharpoons \text{GLCNT-e} + 0.9523 \text{ H+e}$ |  |   |  |
| Lactate   | $\text{LACe} \rightleftharpoons \text{LAC-e} + 0.3039 \text{ H+e}$     | $\text{LACe} \rightleftharpoons \text{LAC-e} + 0.5799 \text{ H+e}$     | $\text{LACe} \rightleftharpoons \text{LAC-e} + 0.8136 \text{ H+e}$     | $\text{LACe} \rightleftharpoons \text{LAC-e} + 0.9324 \text{ H+e}$     |  |   |  |
| Acetate   | $\text{ACe} \rightleftharpoons \text{AC-e} + 0.0532 \text{ H+e}$       | $\text{ACe} \rightleftharpoons \text{AC-e} + 0.151 \text{ H+e}$        | $\text{ACe} \rightleftharpoons \text{AC-e} + 0.3599 \text{ H+e}$       | $\text{ACe} \rightleftharpoons \text{AC-e} + 0.6401 \text{ H+e}$       |  |   |  |
| Oxalate   | $\text{OXALe} \rightleftharpoons \text{OXAL-e} + 1.1644 \text{ H+e}$   | $\text{OXALe} \rightleftharpoons \text{OXAL-e} + 1.3909 \text{ H+e}$   | $\text{OXALe} \rightleftharpoons \text{OXAL-e} + 1.6709 \text{ H+e}$   | $\text{OXALe} \rightleftharpoons \text{OXAL-e} + 1.8659 \text{ H+e}$   |  |   |  |
| Succinate | $\text{SUCCe} \rightleftharpoons \text{SUCC-e} + 0.1821 \text{ H+e}$   | $\text{SUCCe} \rightleftharpoons \text{SUCC-e} + 0.4247 \text{ H+e}$   | $\text{SUCCe} \rightleftharpoons \text{SUCC-e} + 0.7528 \text{ H+e}$   | $\text{SUCCe} \rightleftharpoons \text{SUCC-e} + 1.0726 \text{ H+e}$   |  |   |  |
| Malate    | $\text{MALe} \rightleftharpoons \text{MAL-e} + 0.5768 \text{ H+e}$     | $\text{MALe} \rightleftharpoons \text{MAL-e} + 0.8694 \text{ H+e}$     | $\text{MALe} \rightleftharpoons \text{MAL-e} + 1.1253 \text{ H+e}$     | $\text{MALe} \rightleftharpoons \text{MAL-e} + 1.4170 \text{ H+e}$     |  |   |  |
| pH        | 5.5                                                                    | 6                                                                      | 6.5                                                                    |                                                                        |  |   |  |
| Citrate   | $\text{CITe} \rightleftharpoons \text{CIT-e} + 1.9552 \text{ H+e}$     | $\text{CITe} \rightleftharpoons \text{CIT-e} + 2.2374 \text{ H+e}$     | $\text{CITe} \rightleftharpoons \text{CIT-e} + 2.5503 \text{ H+e}$     |                                                                        |  |   |  |
| Gluconate | $\text{GLCNTe} \rightleftharpoons \text{GLCNT-e} + 0.9844 \text{ H+e}$ | $\text{GLCNTe} \rightleftharpoons \text{GLCNT-e} + 0.995 \text{ H+e}$  | $\text{GLCNTe} \rightleftharpoons \text{GLCNT-e} + 0.9984 \text{ H+e}$ |                                                                        |  |   |  |
| Lactate   | $\text{LACe} \rightleftharpoons \text{LAC-e} + 0.9776 \text{ H+e}$     | $\text{LACe} \rightleftharpoons \text{LAC-e} + 0.9928 \text{ H+e}$     | $\text{LACe} \rightleftharpoons \text{LAC-e} + 0.9977 \text{ H+e}$     |                                                                        |  |   |  |
| Acetate   | $\text{ACe} \rightleftharpoons \text{AC-e} + 0.849 \text{ H+e}$        | $\text{ACe} \rightleftharpoons \text{AC-e} + 0.9468 \text{ H+e}$       | $\text{ACe} \rightleftharpoons \text{AC-e} + 0.9825 \text{ H+e}$       |                                                                        |  |   |  |
| Oxalate   | $\text{OXALe} \rightleftharpoons \text{OXAL-e} + 1.9533 \text{ H+e}$   | $\text{OXALe} \rightleftharpoons \text{OXAL-e} + 1.9847 \text{ H+e}$   | $\text{OXALe} \rightleftharpoons \text{OXAL-e} + 1.9951 \text{ H+e}$   |                                                                        |  |   |  |
| Succinate | $\text{SUCCe} \rightleftharpoons \text{SUCC-e} + 1.4010 \text{ H+e}$   | $\text{SUCCe} \rightleftharpoons \text{SUCC-e} + 1.7033 \text{ H+e}$   | $\text{SUCCe} \rightleftharpoons \text{SUCC-e} + 1.8849 \text{ H+e}$   |                                                                        |  |   |  |
| Malate    | $\text{MALe} \rightleftharpoons \text{MAL-e} + 1.7066 \text{ H+e}$     | $\text{MALe} \rightleftharpoons \text{MAL-e} + 1.8853 \text{ H+e}$     | $\text{MALe} \rightleftharpoons \text{MAL-e} + 1.9609 \text{ H+e}$     |                                                                        |  |   |  |
